## 34 **Main text**

35 Meiosis is a conserved cell division required for eukaryotic sexual reproduction, during  
36 which a single round of DNA replication is coupled to two rounds of chromosome  
37 segregation, generating haploid gametes<sup>1,2</sup>. Homologous chromosomes pair and recombine  
38 during prophase of the first meiotic division, which can result in reciprocal exchange, termed  
39 crossover<sup>1,2</sup>. Crossovers have a major effect on sequence variation in populations and create  
40 genetic diversity. Meiotic recombination is also an important tool used during crop breeding  
41 to combine useful variation. However, crossover numbers are typically low, ~1-2 per  
42 chromosome per meiosis, and can show restricted chromosomal distributions, which limit  
43 crop improvement. For example, recombination is suppressed in large regions surrounding  
44 the centromeres of many crop species<sup>3</sup>. In this work we sought to use our understanding of  
45 meiotic recombination pathways to genetically engineer super-recombining Arabidopsis.

46

47 Meiotic recombination initiates from DNA double strand breaks (DSBs), induced by SPO11  
48 transterases, which act in topoisomerase-VI-like complexes<sup>1,4</sup> (Fig. 1a). During catalysis  
49 SPO11 becomes covalently bound to target site DNA and is liberated by endonucleolytic  
50 cleavage by the MRN (MRE11-RAD50-NBS1) complex and COM1<sup>4</sup>. Simultaneously,  
51 exonucleases generate 3'-overhanging single stranded DNA (ssDNA), approximately 100-  
52 1000s of nucleotides in length<sup>4</sup> (Fig. 1a). Resected ssDNA is bound by RAD51 and DMC1  
53 RecA-like proteins, which promote invasion of a homologous chromosome and the formation  
54 of a displacement loop (D-loop)<sup>5</sup> (Fig. 1a). Stabilization of the D-loop can occur by template-  
55 driven DNA synthesis from the invading 3'-end<sup>4,6</sup> (Fig. 1a). Strand invasion intermediates  
56 may then progress to second-end capture and formation of a double Holliday junction (dHJ),  
57 which can be resolved as a crossover or non-crossover, or undergo dissolution<sup>1,4,6</sup> (Fig. 1a).

58

59 The conserved ZMM pathway acts to promote formation of the majority of crossovers in  
60 plants, which are known as class I<sup>1,6,7</sup> (Fig. 1a). Mutations in ZMM genes severely reduce  
61 Arabidopsis crossover frequency, causing univalent chromosome segregation at metaphase I,  
62 aneuploid gametes and infertility<sup>1,8,9</sup>. Importantly, ZMM-dependent crossovers show  
63 interference, where double crossover events are spaced out more widely than expected by  
64 chance<sup>10,11</sup>. The ZMM pathway in plants includes the MSH4/MSH5 MutS-related  
65 heterodimer, MER3 DNA helicase, SHORTAGE OF CROSSOVERS1 (SHOC1) XPF  
66 nuclease, PARTING DANCERS (PTD), ZIP4/SPO22, HEI10 E3 ligase and the

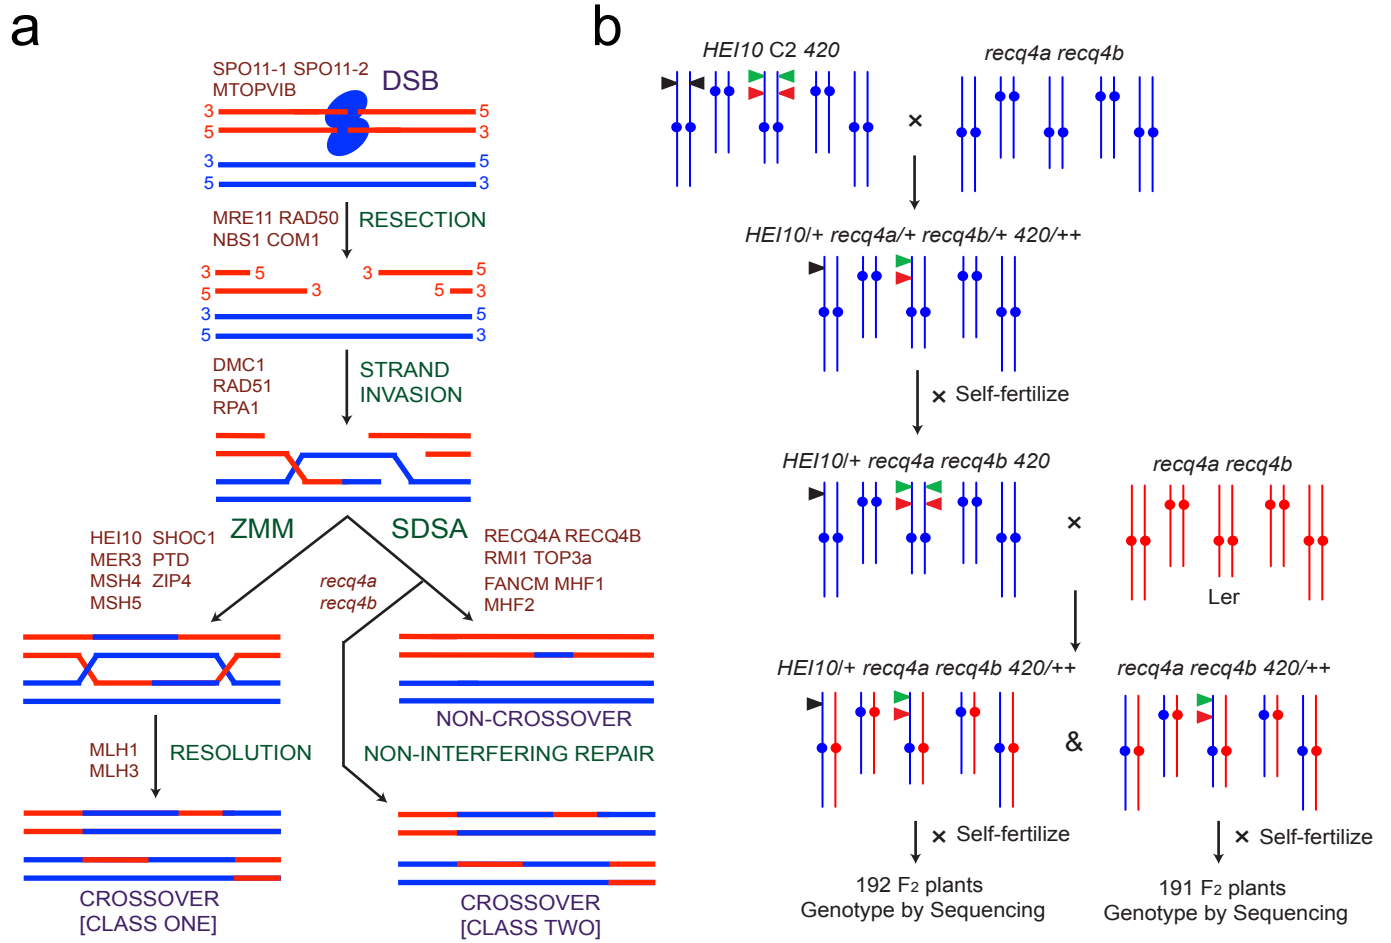

Figure 1

67 **Figure 1. Combining increased *HEI10* dosage with *recq4a recq4b* mutations in order to**  
68 **elevate meiotic crossovers. a.** Schematic diagram showing a subset of pathways acting  
69 during Arabidopsis meiotic recombination. Homologous chromosomes are indicated as red  
70 and blue DNA duplexes. The remaining two sister chromatid duplexes are not shown for  
71 simplicity. Recombination pathways (green) and factors acting within them (red) are printed  
72 alongside chromosomes. **b.** Crossing diagram showing the generation of Col/Ler F<sub>1</sub> plants  
73 that were *recq4a recq4b* mutant, with and without *HEI10* (black triangles). F<sub>2</sub> progeny from  
74 these plants were analysed by genotyping-by-sequencing to map crossover locations. These  
75 populations were compared to wild type F<sub>2</sub> progeny and to a previously reported *HEI10* F<sub>2</sub>  
76 population<sup>12</sup>.

77

78

79

80

81

82

83

84

85

86

87

88

89

90

91

92

93

94

95

96

97

98

99

100

101 MLH1/MLH3 MutL-related heterodimer<sup>1,6,7</sup> (Fig. 1A). Within the ZMM pathway the *HEI10*  
102 E3 ligase gene shows dosage sensitivity, with additional copies being sufficient to increase  
103 crossovers throughout euchromatin<sup>12</sup>. A minority of crossovers in plants, known as class II,  
104 do not show interference and are formed by a different MUS81-dependent pathway<sup>13,14</sup>.

105

106 From cytological measurement of Arabidopsis DSB-associated foci (e.g.  $\gamma$ H2A.X, RAD51  
107 and DMC1) along meiotic chromosomes, it is estimated that between 100-200 breaks initiate  
108 per nucleus<sup>15-17</sup>. However, only ~10 crossovers typically form throughout the genome<sup>18-21</sup>,  
109 indicating that anti-crossover pathways prevent maturation of the majority of initiation events  
110 into crossovers. Indeed, genetic analysis has identified at least three distinct anti-crossover  
111 pathways in Arabidopsis: (i) the FANCM DNA helicase and MHF1 and MHF2 co-factors<sup>22-</sup>  
112 <sup>24</sup>, (ii) the AAA-ATPase FIDGETIN-LIKE1<sup>25</sup> and (iii) the RTR complex of RECQ4A,  
113 RECQ4B DNA helicases, TOPOISOMERASE3 $\alpha$  and RMI1<sup>26-28</sup> (Fig. 1a). For example,  
114 *recq4a recq4b* mutants show highly increased non-interfering crossovers when assayed in  
115 specific intervals<sup>27</sup> (Fig. 1a). This is thought primarily to result from a failure to dissolve  
116 interhomolog strand invasion events, which are alternatively repaired by the non-interfering  
117 crossover pathway(s)<sup>22,25,27</sup>. As combining mutations between these pathways, for example  
118 *fancm fidg1l*, leads to additive crossover increases they reflect parallel mechanisms<sup>25</sup>. Hence,  
119 during meiosis competing pathways act on SPO11-dependent DSBs to balance crossover and  
120 non-crossover repair outcomes (Fig. 1a).

121

122 In this work we explore the functional relationship between ZMM pro-crossover and RECQ4  
123 anti-crossover meiotic recombination pathways. Using a combination of increased *HEI10*  
124 dosage and *recq4a recq4b* mutations, we observe a massive, additive increase in crossover  
125 frequency throughout the chromosome arms. Surprisingly, we observe that increased *HEI10*  
126 dosage causes increased crossover coincidence, indicating an effect on interference. We show  
127 that *HEI10* and *recq4a recq4b* crossover increases are biased towards regions of low  
128 interhomolog divergence, distal from centromeric heterochromatin. Hence, both genetic and  
129 epigenetic information likely constrain the activity of meiotic recombination pathways.

130

### 131 **Combination of *HEI10* and *recq4a recq4b* massively elevates crossover frequency**

132 Crossover increases in *HEI10* and *recq4a recq4b* represent mechanistically distinct effects  
133 via class I and class II crossover repair pathways (Fig. 1a). We therefore sought to test  
134 whether combining these genetic backgrounds would cause further increases in crossover

135 frequency. We previously showed that transgenic line ‘C2’ carrying additional *HEI10* copies,  
136 shows a ~2-fold increase in crossovers genome-wide, compared with wild type<sup>12</sup> (Table 1).  
137 We therefore crossed *HEI10* line C2 to *recq4a recq4b* double mutants, in the Col genetic  
138 background<sup>12,27,29</sup> (Fig. 1b). A previous genetic screen isolated an EMS allele of *recq4a* in  
139 Ler<sup>27</sup>. As Ler carries a natural premature stop codon in *recq4b*<sup>27</sup>, this provides a *recq4a*  
140 *recq4b* double mutant in Ler (Fig. 1b). These lines were crossed and F<sub>1</sub> progeny identified  
141 that were heterozygous for Col/Ler polymorphisms, *recq4a recq4b* mutant and with or  
142 without *HEI10* (Fig. 1b). These F<sub>1</sub> plants were then used to generate Col/Ler F<sub>2</sub> for crossover  
143 analysis (Fig. 1b).

144

145 During crossing we maintained the *420* FTL crossover reporter within our lines, which allows  
146 measurement of genetic distance in a ~5.1 Mb sub-telomeric region on chromosome 3<sup>30,31</sup>  
147 (Figs. 1b, 2a and Supplementary Table 1). This showed that *HEI10*, *recq4a recq4b* and  
148 *HEI10 recq4a recq4b* all significantly increase *420* crossover frequency in Col/Ler  
149 backgrounds, by 2.7, 3.3 and 3.7-fold, respectively ( $\chi^2$   $P=2.73\times 10^{-175}$ ,  $P=4.92\times 10^{-212}$  and  
150  $P=2.80\times 10^{-226}$ ) (Fig. 2a and Supplementary Table 1). However, it is notable that *420* genetic  
151 distance reached 47 cM in *HEI10 recq4a recq4b*, which is close to the maximum observable  
152 recombination frequency for linked markers (i.e. 50 cM) (Fig. 2a and Supplementary Table  
153 1). We next used genotyping-by-sequencing (GBS) to generate genome-wide, high-resolution  
154 maps of crossover distributions in these backgrounds.

155

156 We sequenced genomic DNA from 191-245 Col/Ler F<sub>2</sub> progeny derived from wild type,  
157 *recq4a recq4b* and *HEI10 recq4a recq4b* F<sub>1</sub> parents (Fig. 1b and Table 1), and compared to a  
158 previously described *HEI10* F<sub>2</sub> population<sup>12</sup>. We observed that *recq4a recq4b* caused 3.3-fold  
159 more crossovers genome-wide (25 crossovers/F<sub>2</sub>, 95% confidence interval +/- 0.93),  
160 compared with wild type (7.5 crossovers/F<sub>2</sub>, 95% confidence interval +/- 0.28), which is  
161 greater than the 2-fold increase previously seen in *HEI10* (15.3 crossovers/F<sub>2</sub>, 95%  
162 confidence interval +/- 0.49)<sup>12</sup> (Fig. 2b-2d and Table 1). If the *HEI10* and *recq4a recq4b*  
163 crossover increases combined in a purely additive manner then we would expect to see the  
164 sum of their crossover differentials in *HEI10 recq4a recq4b*, equivalent to  $7.5 + 7.7 + 17.4 =$   
165  $32.6$  crossovers/F<sub>2</sub>. Indeed, this was similar to the observed value for *HEI10 recq4a recq4b*  
166 of 31 crossovers/F<sub>2</sub> (95% confidence interval +/- 0.97) (Fig. 2b-2d and Table 1). For all  
167 populations, the physically largest chromosomes had the longest genetic maps

168

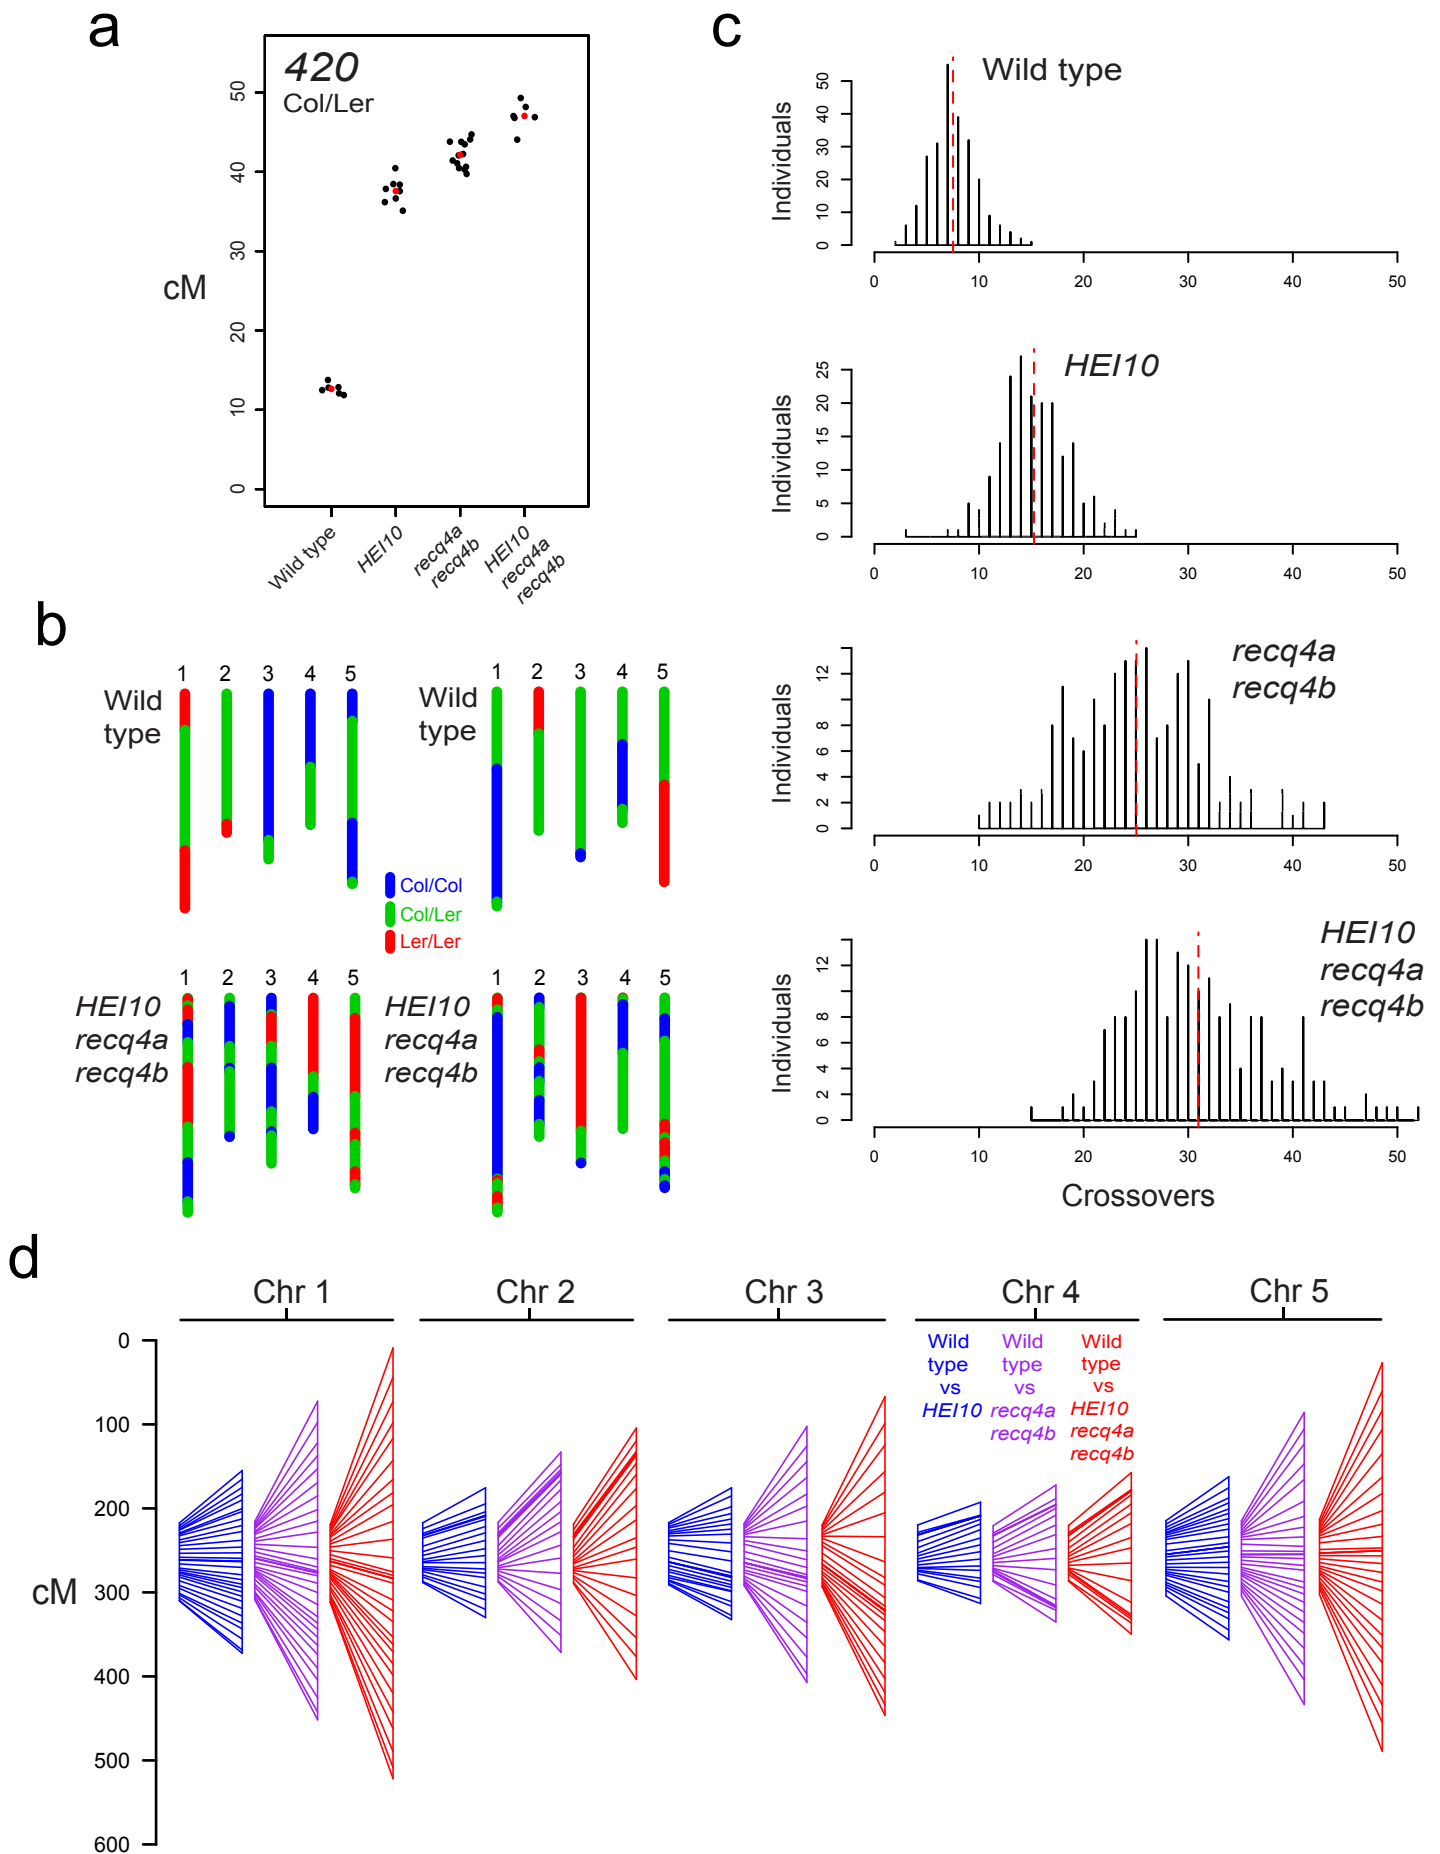

Figure 2

169 **Figure 2. Combination of *HEI10* and *recq4a recq4b* massively increases meiotic**  
 170 **crossover frequency. a.** 420 genetic distance (cM) was measured during breeding of the  
 171 *HEI10* and *recq4a recq4b* mutant populations. All samples were Col/Ler heterozygous.  
 172 Replicate measurements are shown as black dots and mean values as red dots. Plotted data is  
 173 shown in Supplementary Table 1. The *HEI10* data was previously reported<sup>12</sup>. **b.**  
 174 Chromosomal genotypes are shown from two representative individuals from the wild type  
 175 and *HEI10 recq4a recq4b* F<sub>2</sub> populations. The five Arabidopsis chromosomes are depicted  
 176 and colour-coded according to Col/Col (blue), Col/Ler (green) or Ler/Ler (red) genotypes. **c.**  
 177 Histograms showing the frequency of F<sub>2</sub> individuals containing different crossover numbers  
 178 in each population, with the mean value indicated by the horizontal dotted red lines. **d.**  
 179 Genetic maps (cM) shown for each chromosome for *HEI10* (blue), *recq4a recq4b* (magenta)  
 180 and *HEI10 recq4a recq4b* (red). Each map shown alongside the wild type map (left), and  
 181 markers between the maps are connected.

182

183 **Table 1. Crossovers in wild type, *HEI10*, *recq4a recq4b* and *HEI10 recq4a recq4b***  
 184 **Col/Ler F<sub>2</sub> populations.** Crossover numbers identified by genotyping-by-sequencing in the  
 185 indicated F<sub>2</sub> populations are listed. The number of individuals analysed per population is  
 186 indicated in the *n* row. Absolute crossover (COs) numbers are reported, as well as mean  
 187 crossovers per F<sub>2</sub> individual, by chromosome and in total. The CO StDev row shows the  
 188 standard deviation in total crossover numbers per F<sub>2</sub> for each genotype.

|            | GENOTYPE |                    |                         |                    |                                 |                    |                                                 |                    |
|------------|----------|--------------------|-------------------------|--------------------|---------------------------------|--------------------|-------------------------------------------------|--------------------|
|            | Col/Ler  |                    | <i>HEI10</i><br>Col/Ler |                    | <i>recq4a recq4b</i><br>Col/Ler |                    | <i>HEI10</i><br><i>recq4a recq4b</i><br>Col/Ler |                    |
| Chromosome | COs      | COs/F <sub>2</sub> | COs                     | COs/F <sub>2</sub> | COs                             | COs/F <sub>2</sub> | COs                                             | COs/F <sub>2</sub> |
| 1          | 437      | 1.8                | 765                     | 4.0                | 1259                            | 6.6                | 1641                                            | 8.5                |
| 2          | 326      | 1.3                | 525                     | 2.7                | 799                             | 4.2                | 1001                                            | 5.2                |
| 3          | 345      | 1.4                | 546                     | 2.8                | 993                             | 5.2                | 1195                                            | 6.2                |
| 4          | 309      | 1.3                | 417                     | 2.2                | 576                             | 3.0                | 663                                             | 3.5                |
| 5          | 423      | 1.7                | 675                     | 3.5                | 1156                            | 6.1                | 1448                                            | 7.5                |
| Total      | 1840     | 7.5                | 2928                    | 15.3               | 4783                            | 25.0               | 5948                                            | 31.0               |
| <i>n</i>   | 245      |                    | 192                     |                    | 191                             |                    | 192                                             |                    |
| CO StDev   | 2.26     |                    | 3.41                    |                    | 6.52                            |                    | 6.59                                            |                    |

189

190



191 (Supplementary Fig. 1). A subset of wild type and *HEI10 recq4a recq4b* F<sub>2</sub> individuals were  
192 sequenced to higher depth and crossover patterns found to be robustly identified  
193 (Supplementary Fig. 2 and Supplementary Table 2). Together these data show that crossover  
194 elevations caused by increased *HEI10* dosage and loss of the *RECQ4A RECQ4B* anti-  
195 crossover helicases combine in an additive manner, consistent with class I and class II  
196 crossover pathways being independent in Arabidopsis.

197

### 198 **Crossover coincidence increases in both *HEI10* and *recq4a recq4b***

199 Underdispersion of crossover numbers per meiosis occurs due to the action of crossover  
200 interference and homeostasis<sup>6,32</sup>, causing an excess of values close to the mean. Consistently,  
201 we observe that the distribution of crossovers per wild type F<sub>2</sub> individual is significantly non-  
202 Poisson (Goodness-of-fit test for Poisson distribution,  $P=0.012$ ) (Fig. 3a). Observed  
203 frequencies are displayed as bars (grey) plotted from the fitted frequencies (red line), such  
204 that grey bars lying above or below zero on the  $y$ -axis represent deviation from the Poisson  
205 expectation (Fig. 3a). Crossover distributions per individual in *recq4a recq4b* and *HEI10*  
206 *recq4a recq4b* were also non-Poisson (*recq4a recq4b*  $P=1.85\times 10^{-5}$  and *HEI10 recq4a recq4b*  
207  $P=0.0223$ ). However, the high recombination populations also showed significantly greater  
208 variation in crossover numbers compared to wild type (Brown-Levene test, *HEI10*  
209  $P=4.17\times 10^{-7}$ , *recq4a recq4b*  $P=<2.2\times 10^{-16}$ , *HEI10 recq4a recq4b*  $P=<2.2\times 10^{-16}$ ) (Fig. 3a  
210 and Table 1). We therefore sought to examine the distributions of crossovers within the GBS  
211 data in more detail, with respect to inter-crossover spacing.

212

213 Due to F<sub>2</sub> individuals being analysed, which result from two independent meioses, it is not  
214 possible to distinguish between double crossovers (DCOs) occurring on the same (*cis*) or  
215 different (*trans*) chromosomes (Fig. 3b). Importantly, only the *cis* class is informative for  
216 estimation of interference. Despite this limitation, we considered each F<sub>2</sub> individual  
217 separately and identified adjacent DCOs for each chromosome and recorded their distances  
218 (Fig. 3b). Simultaneously, for each individual and chromosome the same number of  
219 randomly chosen positions were used to generate a matched set of randomized distances (Fig.  
220 3b). Consistent with the action of crossover interference, wild type DCO distances were  
221 significantly greater than random (mean=8.57 Mb vs 6.99 Mb, Mann-Whitney Wilcoxon test  
222  $P=1.87\times 10^{-16}$ ) (Fig. 3b). In *HEI10* DCO distances were substantially reduced compared to  
223 wild type, although they were still significantly greater than random (mean=6.09 Mb vs 5.08  
224 Mb, Mann-Whitney Wilcoxon test  $P=9.46\times 10^{-13}$ ) (Fig. 3b). However, in both *recq4a recq4b*

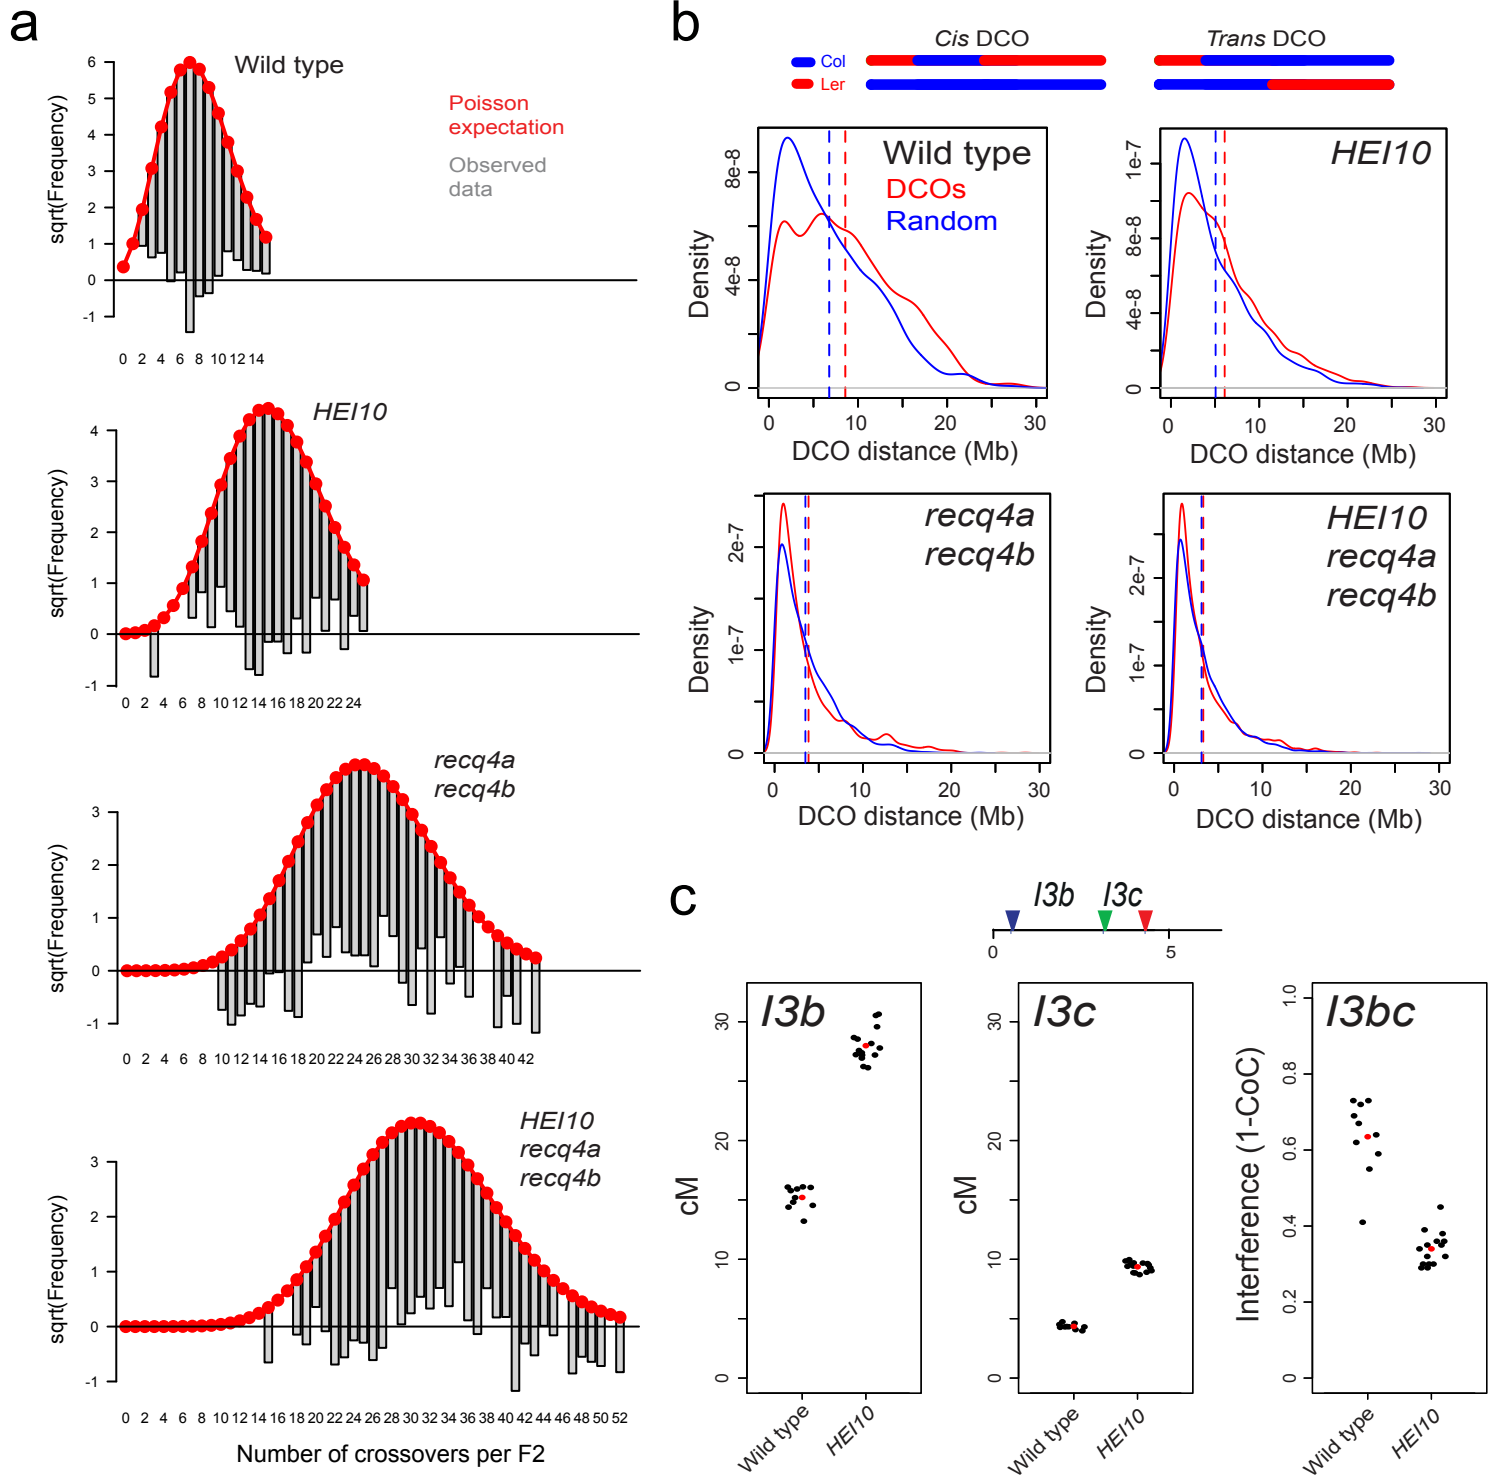

Figure 3

225 **Figure 3. Crossover coincidence increases in *HEI10* and *recq4a recq4b*.** **a.** Plots of the  
226 square root of the frequency of total crossovers per F<sub>2</sub> individual in wild type, *HEI10*, *recq4a*  
227 *recq4b* and *HEI10 recq4a recq4b* populations, generated using the R package goodfit. The  
228 expected Poisson distribution is plotted in red, from which the observed data is plotted.  
229 Deviation from the Poisson expectation is shown by the grey bay (observed data) falling  
230 either above or below the zero value on the y-axis. **b.** A graphical diagram is shown to  
231 illustrate *cis* versus *trans* double crossovers detected in F<sub>2</sub> genotyping-by-sequencing data.  
232 Kernel density estimates are plotted for measured DCO distances in the indicated populations  
233 (red), versus the same number of matched randomly chosen double events (blue). The  
234 vertical dotted lines indicate mean values. **c.** *I3b* and *I3c* genetic distances in wild type and  
235 *HEI10*, and crossover interference (1-CoC) between the *I3b* and *I3c* intervals. Replicate  
236 measurements are shown by black dots and mean values by red dots. The plotted data in  
237 found in Supplementary Tables 3 and 4.

238

239

240

241

242

243

244

245

246

247

248

249

250

251

252

253

254

255

256

257

258

259 (mean=3.84 Mb vs 3.49 Mb, Mann Whitney Wilcoxon test  $P=0.268$ ) and *HEI10 recq4a*  
260 *recq4b* populations (mean=3.30 Mb vs 3.08 Mb, Mann Whitney Wilcoxon test  $P=0.165$ ),  
261 observed DCO distances were not significantly different from random (Fig. 3b). This is  
262 expected due to increased class II crossovers caused by *recq4a recq4b* being randomly  
263 distributed<sup>26</sup>. However, the significant reduction in *HEI10* DCO distances was unexpected,  
264 due to this gene acting in the interference-sensitive ZMM pathway<sup>9,12</sup>.

265

266 To further investigate crossover interference in *HEI10* we used three-colour FTL analysis,  
267 using the adjacent *I3b* and *I3c* intervals, which measure crossover frequency in a sub-  
268 telomeric region of chromosome 3<sup>31,33</sup> (*I3bc* is located within the 420 interval described  
269 earlier) (Fig. 2a and 3c). We used flow cytometry to measure inheritance of pollen  
270 fluorescence in wild type and *HEI10* and calculate *I3b* and *I3c* genetic distances (Fig. 3c and  
271 Supplementary Tables 3-4). Both *I3b* and *I3c* showed a significant increase in crossover  
272 frequency in *HEI10*, consistent with our previous 420 measurements ( $X^2$  test both  
273  $P=<2.2\times 10^{-16}$ ) (Figs. 2b, 3c and Supplementary Tables 1 and 3). *I3b* and *I3c* genetic  
274 distances were used to estimate the number of DCO pollen expected in the absence of  
275 interference, using the formula: Expected DCOs=(*I3b* cM/100)×(*I3c* cM/100)×total pollen  
276 number. The ratio of ‘observed DCOs’ to ‘expected DCOs’ gives the coefficient of  
277 coincidence (CoC), and interference is calculated as 1-CoC, such that zero indicates an  
278 absence of interference<sup>31,33</sup> (Fig. 3c and Supplementary Tables 2-3). Consistent with the  
279 reduction in DCO distances seen in the *HEI10* GBS data, *I3bc* interference (1-CoC)  
280 significantly decreased from 0.64 in wild type to 0.34 in *HEI10* ( $X^2$  test  $P=<2.2\times 10^{-16}$ ) (Fig.  
281 3c and Supplementary Tables 3-4). These experiments confirm our GBS observations and  
282 reveal that although *HEI10* functions in the interfering ZMM pathway, higher *HEI10* dosage  
283 causes increased crossover coincidence compared to wild type, although not to the degree  
284 observed in *recq4a recq4b*<sup>26</sup> (Fig. 3b).

285

### 286 **Crossover frequency, interhomolog divergence and DNA methylation landscapes**

287 We next sought to analyse crossover distributions along the chromosomes, and relate these  
288 patterns to other aspects of genome organization (Fig. 4). On average 7.5 crossovers were  
289 observed per wild type F<sub>2</sub> individual, 5.6 of which occurred in the chromosome arms and 1.9  
290 in the pericentromeric heterochromatin (Supplementary Fig. 3 and Supplementary Table 5).  
291 In *HEI10*, *recq4a recq4b* and *HEI10 recq4a recq4b*, crossovers in the arms increased 2.3, 4.1  
292 and 5-fold, respectively (5.6 -> 13.1 -> 23 -> 28.2 crossovers), whereas the pericentromeres

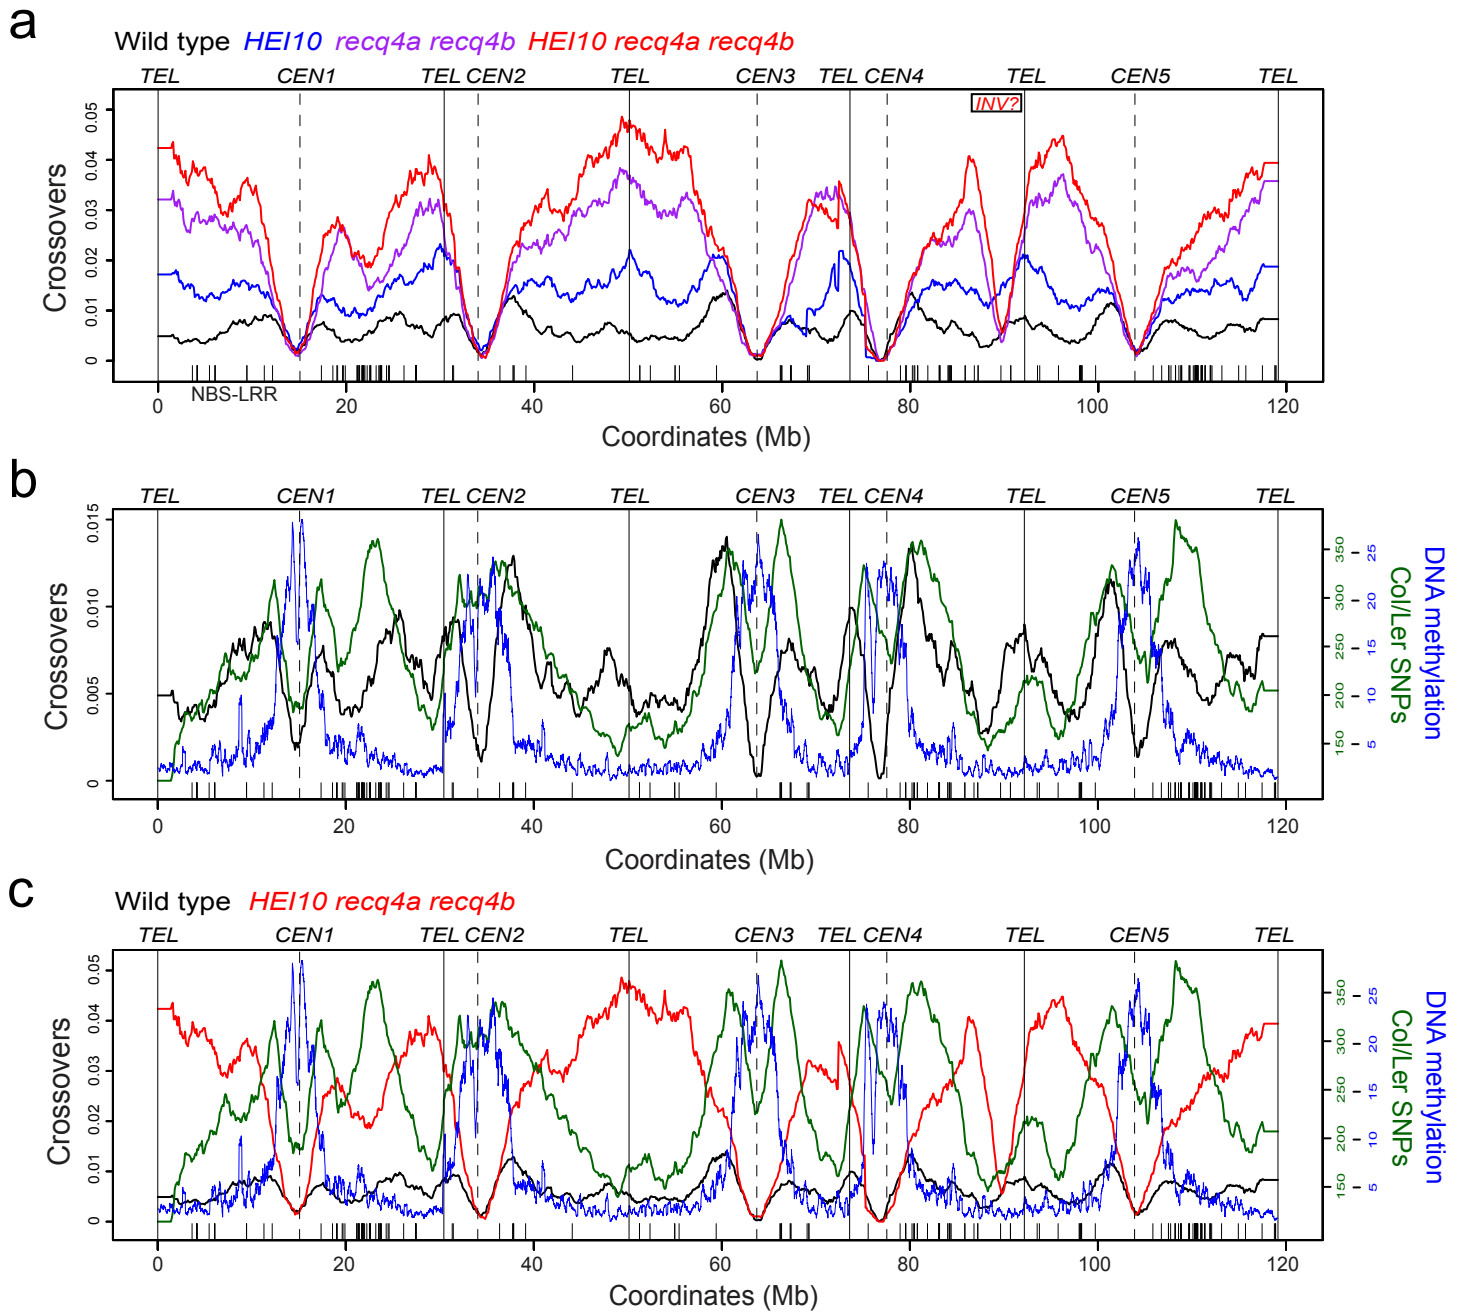

Figure 4

293 **Figure 4. Genomic landscapes of crossover frequency, interhomolog divergence and**  
294 **DNA methylation. a.** Plots of normalized crossover frequency measured in wild type  
295 (black), *HEI10* (blue), *recq4a recq4b* (purple) and *HEI10 recq4a recq4b* (red). The five  
296 chromosomes are plotted on a continuous x-axis, with the positions of telomeres (*TEL*) and  
297 centromeres (*CEN*) indicated by vertical lines. The position of NBS-LRR resistance gene  
298 homologs are indicated by the x-axis ticks. The putative location of an inversion in the  
299 *recq4a recq4b* derived populations is also indicated and labelled ‘*INV?*’. **b.** As for a., but  
300 showing wild type crossover frequency plotted against Col/Ler SNPs (green)<sup>34</sup> and DNA  
301 methylation (blue)<sup>35</sup>. **c.** As for b., but showing both wild type (black) and *HEI10 recq4a*  
302 *recq4b* (red) crossover frequency.

303  
304  
305  
306  
307  
308  
309  
310  
311  
312  
313  
314  
315  
316  
317  
318  
319  
320  
321  
322  
323  
324  
325  
326

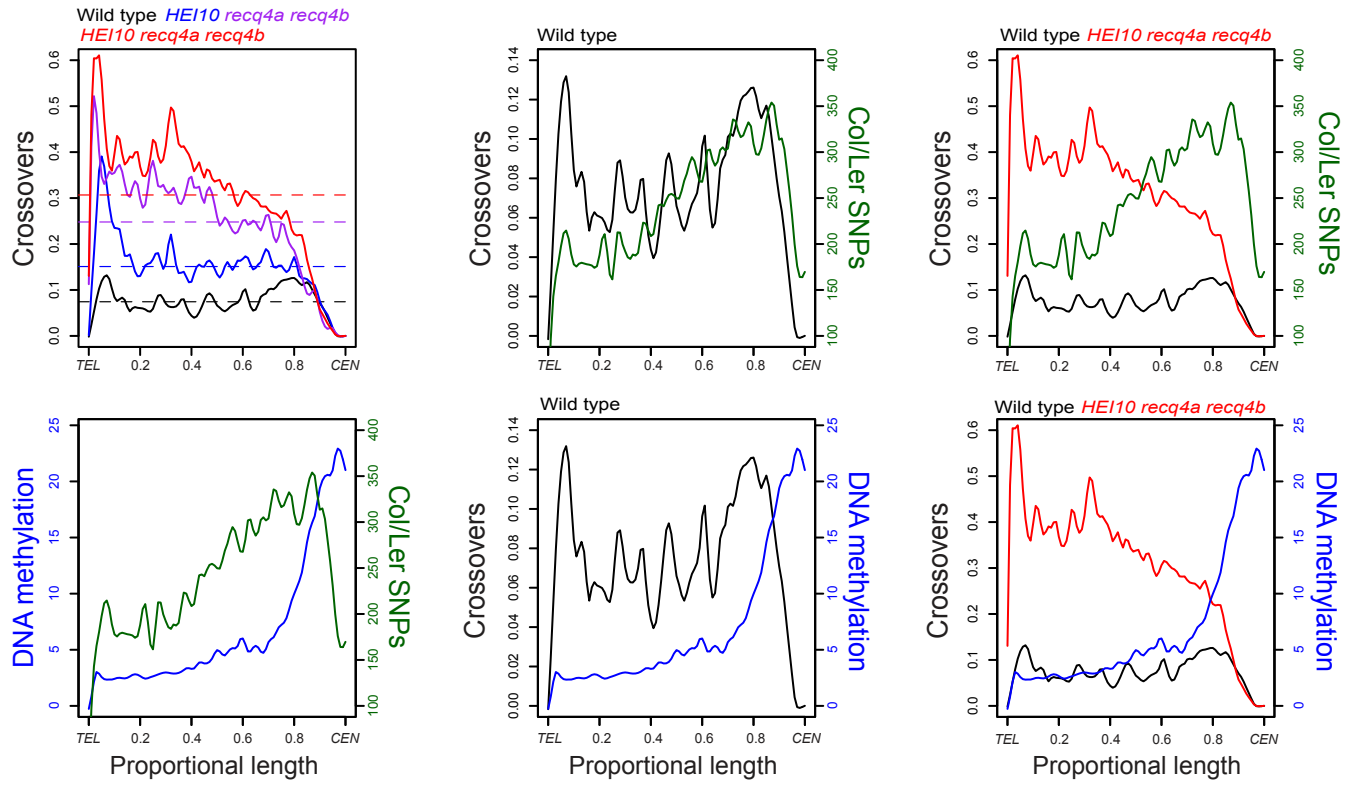

Figure 5

327 **Figure 5. Crossover frequency, interhomolog divergence and DNA methylation along**  
328 **telomere-centromere chromosome axes.** Analysis of crossover frequency in wild type  
329 (black), *HEI10* (blue), *recq4a recq4b* (purple) and *HEI10 recq4a recq4b* (red), Col/Ler SNPs  
330 (green)<sup>34</sup> and DNA methylation (blue)<sup>35</sup>, analysed along the proportional length of all  
331 chromosome arms, orientated from telomeres (*TEL*) to centromeres (*CEN*).

332

333

334

335

336

337

338

339

340

341

342

343

344

345

346

347

348

349

350

351

352

353

354

355

356

357

358

359

360



361 increases of 1.1, 1.1 and 1.5-fold, respectively (1.9 -> 2.1 -> 2.0 -> 2.7 crossovers), were  
362 considerably lower (Supplementary Fig. 3 and Supplementary Table 5). Consistent with  
363 previous observations<sup>12,27</sup>, we observed that despite massive crossover increases throughout  
364 the chromosome arms, *HEI10*, *recq4a recq4b* and *HEI10 recq4a recq4b* maintain  
365 suppression of recombination within the centromeric regions (Fig. 4a). We also observed that  
366 a sub-telomeric region on the long arm of chromosome four showed relative suppression of  
367 crossovers, specifically in the *recq4a recq4b* and *HEI10 recq4a recq4b* populations (Fig. 4a).  
368 This may reflect a lineage-specific sequence rearrangement, such as an inversion, shared  
369 among the *recq4a recq4b* backgrounds.

370

371 We hypothesized that genetic and epigenetic factors could contribute to the observed biases  
372 in crossover increases towards the telomeres. Therefore, we compared recombination to  
373 patterns of Col/Ler interhomolog divergence<sup>34</sup> (i.e. heterozygosity), and DNA cytosine  
374 methylation<sup>35</sup>. Within the chromosome arms we observed that wild type crossovers showed a  
375 positive relationship with divergence ( $r=0.514$ ), which is similar to correlations previously  
376 observed between historical recombination and sequence diversity<sup>31</sup> (Figs. 4b and 5). In  
377 contrast, an opposite, negative correlation was seen between *HEI10 recq4a recq4b* crossovers  
378 and divergence ( $r=-0.658$ ) (Figs. 4b and 5). This indicates that the crossover elevations seen  
379 in *HEI10 recq4a recq4b* are biased towards the least polymorphic regions of the  
380 chromosomes. Hence, while the class II repair pathway that is active in *recq4a recq4b* is not  
381 completely inhibited by heterozygosity, it shows a preference for regions of low divergence.  
382 The densely DNA methylated centromeric regions are also strongly crossover suppressed in  
383 all populations, consistent with heterochromatin inhibiting meiotic recombination<sup>35</sup> (Figs. 4b  
384 and 5). Therefore, although combination of *HEI10* and *recq4a recq4b* causes a massive  
385 crossover increase, the localization of recombination is significantly constrained by both  
386 interhomolog sequence divergence and chromatin.

387

## 388 **Discussion**

389 We show that elevating the ZMM crossover pathway, via increased dosage of the *HEI10*  
390 meiotic E3 ligase gene, while simultaneously increasing the activity of non-interfering repair,  
391 via mutation of *RECQ4A* and *RECQ4B* anti-recombination helicase genes, is sufficient to  
392 cause a massive increase in Arabidopsis meiotic crossovers. This is consistent with class I  
393 and class II acting as independent crossover repair pathways in plants. HEI10 is a conserved  
394 ubiquitin/SUMO E3 ligase with unknown targets during Arabidopsis meiosis, which may

395 include other ZMM factors<sup>1,6,36</sup>. In plants HEI10 associates with paired homologous  
396 chromosomes throughout meiotic prophase, showing gradual restriction to a small number of  
397 foci that correspond to crossover locations<sup>9,37</sup>. We propose that HEI10 acts quantitatively to  
398 promote ZMM pathway crossover repair at recombination sites via SUMO or ubiquitin  
399 transfer. Unexpectedly, we show that increased *HEI10* dosage causes higher crossover  
400 coincidence and therefore a decrease in genetic interference. Crossover interference has been  
401 modelled as a mechanical force, thought to be transmitted via the meiotic chromosome axis  
402 and/or synaptonemal complex (SC)<sup>38</sup>. Therefore, HEI10 may modify recombination factors at  
403 repair foci and decrease their sensitivity to the interference signal, thereby increasing the  
404 likelihood of ZMM-dependent crossover designation. Alternatively HEI10 may alter  
405 transmission of the interference signal *per se*, for example, if components of the axis or SC  
406 are SUMO/ubiquitin targets.

407

408 The RECQ4 helicases have biochemically characterised activities in (i) disassembly of D-  
409 loops and (ii) decatenation of dHJs<sup>39-41</sup>, and thus can promote non-crossover outcomes at  
410 multiple recombination steps post-strand invasion. In the *recq4a recq4b* mutant it is likely  
411 that unrepaired joint molecules persist, which are instead repaired as non-interfering class II  
412 crossovers<sup>27</sup> (Fig. 1a). We show that combination of genetic backgrounds that increase class I  
413 and class II crossovers is sufficient to cause a massive and additive recombination increase  
414 from 7.5 to 31 crossovers per Arabidopsis F<sub>2</sub> individual. However, given that ~100-200 DSB  
415 foci have been cytogenetically observed in Arabidopsis there likely remains the capacity for  
416 further crossover increases<sup>15-17</sup>. As the Arabidopsis anti-crossover pathways do not show  
417 complete redundancy<sup>22,25,27,42</sup>, combination of mutations in the *FANCM*, *RECQ4A-RECQ4B*  
418 and *FIGL1* pathways has the potential to cause further increases. Furthermore, the  
419 Arabidopsis MSH2 MutS homolog acts to suppress crossovers specifically when homologous  
420 chromosomes are polymorphic<sup>43</sup>, and therefore introduction of *msh2* mutations may further  
421 increase recombination. The use of *msh2* is attractive, as it may reduce or lessen the bias  
422 against crossovers observed in divergent regions in *HEI10 recq4a recq4b*. Equally,  
423 modification of epigenetic information has the potential to increase crossovers in centromeric  
424 regions. However, as plant heterochromatin is maintained by multiple interacting systems of  
425 epigenetic marks, including DNA methylation, H3K9me2, H3K27me1 and H2A.W<sup>44,45</sup>, these  
426 marks may have differentiated functions in control of recombination<sup>35</sup>. In conclusion,  
427 advanced tailoring of genetic backgrounds may further bias meiotic DSB repair to crossover  
428 fates, which has the potential to accelerate crop breeding and improvement.

## 429 **Materials and Methods**

430

### 431 **Plant Materials**

432 Arabidopsis lines used in this study were the Col *HEI10* line ‘C2’<sup>12</sup>, Col *recq4a-4* (N419423)  
433 <sup>29</sup>, Col *recq4b-2* (N511130)<sup>29</sup> and Ler *recq4a* line (W387\*)<sup>27</sup>. Genotyping of *recq4a-4* was  
434 performed by PCR amplification using *recq4a-F* and *recq4-wt-R* oligonucleotides for wild  
435 type and *recq4a-F* and *recq4-mut-R* for *recq4a-4*. Genotyping of *recq4b-2* was carried out by  
436 PCR amplification using *recq4b-wt-F* and *R* oligonucleotides for wild type and *recq4b-mut-F*  
437 and *R* oligonucleotides for *recq4b-2*. Genotyping of *recq4a* mutation in Ler was performed  
438 by PCR amplification using *recq4a-Ler-F* and *R* oligonucleotides and subsequent digestion of  
439 the PCR products by *ScrFI* restriction enzyme, which yields ~160 bp products for wild type  
440 and ~180 bp products for *recq4a*. The presence of *HEI10* transgene was tested for by PCR  
441 amplification using *HEI10-F* and *HEI10-R* oligonucleotides. Oligonucleotide sequences are  
442 provided in Supplementary Table 6.

443

### 444 **Measurement of crossover frequency using fluorescent tagged lines**

445 420 genetic distance was measured using microscopic analysis of seed fluorescence, as  
446 described<sup>30,31</sup>. *I3bc* genetic distances and the coefficient of coincidence were measured using  
447 fluorescent pollen and flow cytometry, as described<sup>31</sup>.

448

### 449 **Genotyping-by-sequencing**

450 Genomic DNA was extracted and used to generate genotyping-by-sequencing libraries as  
451 described<sup>42</sup>. Sequence data was analysed to identify crossover locations using the TIGER  
452 bioinformatics pipeline<sup>46</sup>. In order to generate genetic maps the GBS genotypes called from  
453 each library were used to call ‘marker’ genotypes at 1 Mb intervals. These calls were then  
454 used as an input for the R package *Rqtl* in order to generate genetic maps using the Haldane  
455 mapping function<sup>47</sup>. The R package *goodfit* was used to compare observed crossover  
456 numbers per individual to the Poisson expectation. Statistical analysis of FTL crossover  
457 frequency and interference measurements were performed as described<sup>12,31</sup>.

458

459

460

461

462

## 463 References

- 464 1. Mercier, R., Mézard, C., Jenczewski, E., Macaisne, N. & Grelon, M. The molecular  
465 biology of meiosis in plants. *Annu. Rev. Plant Biol.* **66**, 297–327 (2015).
- 466 2. Villeneuve, A. M. & Hillers, K. J. Whence meiosis? *Cell* **106**, 647–50 (2001).
- 467 3. Higgins, J. D., Osman, K., Jones, G. H. & Franklin, F. C. H. Factors Underlying  
468 Restricted Crossover Localization in Barley Meiosis. *Annu. Rev. Genet.* (2014).  
469 doi:10.1146/annurev-genet-120213-092509
- 470 4. Keeney, S. & Neale, M. J. Initiation of meiotic recombination by formation of DNA  
471 double-strand breaks: mechanism and regulation. *Biochem. Soc. Trans.* **34**, 523–5  
472 (2006).
- 473 5. Brown, M. S. & Bishop, D. K. DNA Strand Exchange and RecA Homologs in  
474 Meiosis. *Cold Spring Harb. Perspect. Biol.* **7**, a016659 (2015).
- 475 6. Hunter, N. Meiotic Recombination: The Essence of Heredity. *Cold Spring Harb.*  
476 *Perspect. Biol.* **7**, a016618 (2015).
- 477 7. Lynn, A., Soucek, R. & Börner, G. V. ZMM proteins during meiosis: crossover artists  
478 at work. *Chromosom. Res.* **15**, 591–605 (2007).
- 479 8. Higgins, J. D., Armstrong, S. J., Franklin, F. C. H. & Jones, G. H. The Arabidopsis  
480 MutS homolog AtMSH4 functions at an early step in recombination: evidence for two  
481 classes of recombination in Arabidopsis. *Genes Dev.* **18**, 2557–70 (2004).
- 482 9. Chelysheva, L. *et al.* The Arabidopsis HEI10 is a new ZMM protein related to Zip3.  
483 *PLoS Genet.* **8**, e1002799 (2012).
- 484 10. Copenhaver, G. P., Housworth, E. A. & Stahl, F. W. Crossover interference in  
485 Arabidopsis. *Genetics* **160**, 1631–9 (2002).
- 486 11. Mercier, R. *et al.* Two meiotic crossover classes cohabit in Arabidopsis: one is  
487 dependent on MER3, whereas the other one is not. *Curr. Biol.* **15**, 692–701 (2005).
- 488 12. Ziolkowski, P. A. *et al.* Natural variation and dosage of the HEI10 meiotic E3 ligase  
489 control Arabidopsis crossover recombination. *Genes Dev.* **31**, 306–317 (2017).
- 490 13. Higgins, J. D., Buckling, E. F., Franklin, F. C. H. & Jones, G. H. Expression and  
491 functional analysis of AtMUS81 in Arabidopsis meiosis reveals a role in the second  
492 pathway of crossing-over. *Plant J.* **54**, 152–162 (2008).
- 493 14. Berchowitz, L. E., Francis, K. E., Bey, A. L. & Copenhaver, G. P. The Role of  
494 AtMUS81 in Interference-Insensitive Crossovers in *A. thaliana*. *PLoS Genet.* **3**, e132  
495 (2007).
- 496 15. Chelysheva, L. *et al.* An easy protocol for studying chromatin and recombination  
497 protein dynamics during Arabidopsis thaliana meiosis: immunodetection of cohesins,  
498 histones and MLH1. *Cytogenet. Genome Res.* **129**, 143–53 (2010).
- 499 16. Choi, K. *et al.* Arabidopsis meiotic crossover hot spots overlap with H2A.Z  
500 nucleosomes at gene promoters. *Nat. Genet.* **45**, 1327–36 (2013).
- 501 17. Ferdous, M. *et al.* Inter-homolog crossing-over and synapsis in Arabidopsis meiosis  
502 are dependent on the chromosome axis protein AtASY3. *PLoS Genet.* **8**, e1002507  
503 (2012).
- 504 18. Wijnker, E. *et al.* The genomic landscape of meiotic crossovers and gene conversions  
505 in Arabidopsis thaliana. *Elife* **2**, e01426 (2013).
- 506 19. Copenhaver, G. P., Browne, W. E. & Preuss, D. Assaying genome-wide recombination  
507 and centromere functions with Arabidopsis tetrads. *Proc. Natl. Acad. Sci. U. S. A.* **95**,  
508 247–52 (1998).
- 509 20. Salomé, P. A. *et al.* The recombination landscape in Arabidopsis thaliana F2  
510 populations. *Heredity (Edinb)*. **108**, 447–55 (2012).
- 511 21. Giraut, L. *et al.* Genome-wide crossover distribution in Arabidopsis thaliana meiosis  
512 reveals sex-specific patterns along chromosomes. *PLoS Genet.* **7**, e1002354 (2011).

- 513 22. Crismani, W. *et al.* FANCM limits meiotic crossovers. *Science* **336**, 1588–90 (2012).
- 514 23. Girard, C. *et al.* FANCM-associated proteins MHF1 and MHF2, but not the other  
515 Fanconi anemia factors, limit meiotic crossovers. *Nucleic Acids Res.* **42**, 9087–95  
516 (2014).
- 517 24. Knoll, A. *et al.* The Fanconi anemia ortholog FANCM ensures ordered homologous  
518 recombination in both somatic and meiotic cells in Arabidopsis. *Plant Cell* **24**, 1448–  
519 64 (2012).
- 520 25. Girard, C. *et al.* AAA-ATPase FIDGETIN-LIKE 1 and Helicase FANCM Antagonize  
521 Meiotic Crossovers by Distinct Mechanisms. *PLoS Genet.* **11**, e1005369 (2015).
- 522 26. Séguéla-Arnaud, M. *et al.* RMI1 and TOP3 $\alpha$  limit meiotic CO formation through their  
523 C-terminal domains. *Nucleic Acids Res.* **287**, gkw1210 (2016).
- 524 27. Séguéla-Arnaud, M. *et al.* Multiple mechanisms limit meiotic crossovers: TOP3 $\alpha$  and  
525 two BLM homologs antagonize crossovers in parallel to FANCM. *Proc. Natl. Acad.*  
526 *Sci. U. S. A.* **112**, 4713–8 (2015).
- 527 28. Bonnet, S., Knoll, A., Hartung, F. & Puchta, H. Different functions for the domains of  
528 the Arabidopsis thaliana RMI1 protein in DNA cross-link repair, somatic and meiotic  
529 recombination. *Nucleic Acids Res.* **41**, 9349–9360 (2013).
- 530 29. Hartung, F., Suer, S. & Puchta, H. Two closely related RecQ helicases have  
531 antagonistic roles in homologous recombination and DNA repair in Arabidopsis  
532 thaliana. *Proc. Natl. Acad. Sci.* **104**, 18836–18841 (2007).
- 533 30. Melamed-Bessudo, C., Yehuda, E., Stuitje, A. R. & Levy, A. A. A new seed-based  
534 assay for meiotic recombination in Arabidopsis thaliana. *Plant J.* **43**, 458–66 (2005).
- 535 31. Ziolkowski, P. A. *et al.* Juxtaposition of heterozygous and homozygous regions causes  
536 reciprocal crossover remodelling via interference during Arabidopsis meiosis. *Elife* **4**,  
537 (2015).
- 538 32. Jones, G. H. & Franklin, F. C. H. Meiotic crossing-over: obligation and interference.  
539 *Cell* **126**, 246–8 (2006).
- 540 33. Berchowitz, L. E. & Copenhaver, G. P. Fluorescent Arabidopsis tetrads: a visual assay  
541 for quickly developing large crossover and crossover interference data sets. *Nat.*  
542 *Protoc.* **3**, 41–50 (2008).
- 543 34. Zapata, L. *et al.* Chromosome-level assembly of *Arabidopsis thaliana* L *er* reveals the  
544 extent of translocation and inversion polymorphisms. *Proc. Natl. Acad. Sci.* **113**,  
545 E4052–E4060 (2016).
- 546 35. Yelina, N. E. *et al.* DNA methylation epigenetically silences crossover hot spots and  
547 controls chromosomal domains of meiotic recombination in Arabidopsis. *Genes Dev.*  
548 **29**, 2183–202 (2015).
- 549 36. Gray, S. & Cohen, P. E. Control of Meiotic Crossovers: From Double-Strand Break  
550 Formation to Designation. *Annu. Rev. Genet.* **50**, 175–210 (2016).
- 551 37. Wang, K. *et al.* The role of rice HEI10 in the formation of meiotic crossovers. *PLoS*  
552 *Genet.* **8**, e1002809 (2012).
- 553 38. Kleckner, N. *et al.* A mechanical basis for chromosome function. *Proc. Natl. Acad.*  
554 *Sci. U. S. A.* **101**, 12592–12597 (2004).
- 555 39. Bachrati, C. Z., Borts, R. H. & Hickson, I. D. Mobile D-loops are a preferred substrate  
556 for the Bloom’s syndrome helicase. *Nucleic Acids Res.* **34**, 2269–79 (2006).
- 557 40. Cejka, P., Plank, J. L., Bachrati, C. Z., Hickson, I. D. & Kowalczykowski, S. C. Rmi1  
558 stimulates decatenation of double Holliday junctions during dissolution by Sgs1-Top3.  
559 *Nat. Struct. Mol. Biol.* **17**, 1377–82 (2010).
- 560 41. Wu, L. & Hickson, I. D. The Bloom’s syndrome helicase suppresses crossing over  
561 during homologous recombination. *Nature* **426**, 870–874 (2003).

- 562 42. Choi, K. *et al.* Recombination Rate Heterogeneity within Arabidopsis Disease  
563 Resistance Genes. *PLOS Genet.* **12**, e1006179 (2016).
- 564 43. Emmanuel, E., Yehuda, E., Melamed-Bessudo, C., Avivi-Ragolsky, N. & Levy, A. A.  
565 The role of AtMSH2 in homologous recombination in Arabidopsis thaliana. *EMBO*  
566 *Rep.* **7**, 100–5 (2006).
- 567 44. Law, J. A. & Jacobsen, S. E. Establishing, maintaining and modifying DNA  
568 methylation patterns in plants and animals. *Nat. Rev. Genet.* **11**, 204–220 (2010).
- 569 45. Yelagandula, R. *et al.* The histone variant H2A.W defines heterochromatin and  
570 promotes chromatin condensation in Arabidopsis. *Cell* **158**, 98–109 (2014).
- 571 46. Rowan, B. A., Patel, V., Weigel, D. & Schneeberger, K. Rapid and Inexpensive  
572 Whole-Genome Genotyping-by-Sequencing for Crossover Localization and Fine-Scale  
573 Genetic Mapping. *G3 (Bethesda)*. **5**, 385–98 (2015).
- 574 47. Arends, D., Prins, P., Jansen, R. C. & Broman, K. W. R/qlt: high-throughput multiple  
575 QTL mapping. *Bioinformatics* **26**, 2990–2 (2010).
- 576  
577

## 578 **Acknowledgements**

579 This work was supported by grants from BBSRC (BB/L006847/1), ERA-CAPS/BBSRC  
580 ‘DeCOP’ (BB/M004937/1), ERC (CoG), the Gatsby Charitable Foundation (GAT2962) and a  
581 Royal Society University Research Fellowship.

582

## 583 **Competing financial interests**

584 The use of *HEI10* to increase meiotic recombination is claimed in UK patent application  
585 number GB1620641.9 filed 5<sup>th</sup> December 2016 by the University of Cambridge. Patents were  
586 deposited by INRA on the use of *RECQ4* to manipulate meiotic recombination in plants  
587 (EP3149027).

588

589

590

591

592

593

594

595

596

597

598
